# Supplementary material for: Trends in public health emergencies in the WHO African Region: an analysis of the past two decades public health events from 2001 to 2022
Source: PubMed Central journal article supplement — BMJ Glob Health. 2023 Oct 9;8(10):e012015. doi: 10.1136/bmjgh-2023-012015 (PMC10565238; doi:10.1136/bmjgh-2023-012015), 2023-10-09
Supplement: bmjgh-2023-012015supp001.pdf [file bmjgh-2023-012015supp001.pdf]

## By Country

| Country               | Yellow Fever | Dengue fever | Lassa Fever | CCHF | RVF | Monkeypox | Anthrax | Plague |
|-----------------------|--------------|--------------|-------------|------|-----|-----------|---------|--------|
| Uganda                | 6            |              |             |      | 9   | 9         | 5       | 5      |
| DRC                   | 6            |              |             |      | 1   | 15        | 1       | 10     |
| Senegal               | 8            | 7            |             |      | 10  | 5         |         |        |
| Mauritania            | 1            | 6            |             |      | 18  | 8         |         |        |
| Kenya                 | 2            | 5            |             |      |     | 5         | 5       |        |
| Guinea                | 12           |              | 7           |      |     |           | 2       |        |
| Liberia               | 6            |              | 12          |      |     | 2         |         |        |
| Madagascar            |              | 1            |             |      |     | 2         |         | 16     |
| Congo (the)           | 5            |              |             |      |     | 6         |         |        |
| Côte d'Ivoire         | 13           | 5            |             |      |     |           |         |        |
| Nigeria               | 1            | 1            | 12          |      |     | 2         |         |        |
| Cameroon              | 11           |              |             |      |     | 5         |         |        |
| Sierra Leon           | 3            |              | 11          |      |     | 1         | 1       |        |
| Mali                  | 5            | 3            |             |      | 2   | 4         |         |        |
| CAR                   | 7            |              |             |      |     | 1         | 6       |        |
| Namibia               |              | 1            |             |      | 10  | 1         |         | 3      |
| South Africa          |              |              | 1           |      | 5   | 5         | 1       |        |
| Tanzania (UR)         |              | 3            |             |      |     | 1         |         | 4      |
| Angola                | 1            | 4            |             |      |     |           | 2       |        |
| Benin                 |              | 2            | 9           |      |     | 1         |         |        |
| Burkina Faso          | 9            | 2            | 1           |      |     |           |         |        |
| Ethiopia              | 3            | 3            |             |      |     |           |         | 1      |
| Ghana                 | 5            |              | 2           |      |     |           | 1       | 2      |
| Chad                  | 4            |              |             |      |     | 1         |         | 1      |
| Togo                  | 3            | 1            | 4           |      |     |           |         |        |
| Zambia                |              |              |             |      |     |           |         | 4      |
| Zimbabwe              |              |              |             |      |     |           |         | 7      |
| Gabon                 | 2            | 1            |             |      |     |           |         |        |
| Seychelles            |              | 4            |             |      |     |           |         |        |
| South Sudan           | 2            |              |             |      |     | 1         |         | 1      |
| Cape Verde            |              | 3            |             |      |     |           |         |        |
| Comoros               |              | 2            |             |      |     | 2         |         |        |
| Mauritius             |              | 3            |             |      |     |           |         |        |
| Algeria               |              |              |             |      |     |           |         |        |
| Mozambique            |              | 1            |             |      |     |           | 3       |        |
| Niger                 | 2            | 1            |             |      |     | 1         |         |        |
| Guinea-Bissau         |              |              |             |      |     |           |         | 2      |
| Gambia                | 1            |              |             |      |     | 1         |         |        |
| Lesotho               |              |              |             |      |     |           |         | 2      |
| Eritrea               |              | 1            |             |      |     |           |         |        |
| Malawi                |              |              |             |      |     |           |         |        |
| Rwanda                |              |              |             |      |     |           |         |        |
| Sao Tome and Principe |              | 1            |             |      |     |           |         |        |
| Total                 | 118          | 61           | 59          |      | 55  | 47        | 43      | 40     |

## By year

| Year  | Yellow Fever | Dengue fever | Lassa Fever | CCHF | RVF | Monkeypox | Anthrax | Plague |    |
|-------|--------------|--------------|-------------|------|-----|-----------|---------|--------|----|
| 2001  | 8            |              |             |      | 1   |           | 4       | 1      | 3  |
| 2002  | 4            |              |             |      | 1   | 2         | 3       | 1      | 1  |
| 2003  | 6            |              |             | 1    | 1   | 2         | 1       | 1      | 1  |
| 2004  | 7            |              |             | 2    | 1   |           |         | 1      | 1  |
| 2005  | 9            |              |             | 2    | 1   |           | 1       | 1      | 3  |
| 2006  | 4            | 1            |             | 2    |     | 1         |         | 1      | 2  |
| 2007  |              |              |             | 2    |     | 2         | 1       | 1      | 5  |
| 2008  | 7            | 2            |             | 2    | 2   | 3         | 3       | 1      | 4  |
| 2009  | 11           | 3            |             | 2    | 1   | 1         |         | 1      | 1  |
| 2010  | 5            | 4            |             | 3    | 3   | 2         | 1       |        | 3  |
| 2011  | 5            | 2            |             | 3    |     | 2         | 1       | 2      | 4  |
| 2012  | 3            |              |             | 1    |     | 1         |         | 3      |    |
| 2013  | 6            | 4            |             | 3    | 3   | 1         |         | 1      | 1  |
| 2014  |              |              |             | 2    |     |           |         |        | 2  |
| 2015  | 1            | 6            |             | 1    | 5   | 3         | 2       | 3      | 2  |
| 2016  | 8            | 3            |             | 3    |     | 4         | 2       | 3      |    |
| 2017  | 1            | 10           |             | 7    | 10  | 3         | 5       | 5      | 3  |
| 2018  | 9            | 6            |             | 3    | 5   | 5         | 3       | 3      | 1  |
| 2019  | 2            | 9            |             | 6    | 8   | 4         | 2       | 7      | 2  |
| 2020  | 8            | 3            |             | 2    | 5   | 3         | 2       |        |    |
| 2021  | 6            | 3            |             | 5    | 2   | 4         | 1       |        | 1  |
| 2022  | 8            | 5            |             | 7    | 6   | 4         | 11      | 7      |    |
| Total | 118          | 61           |             | 59   | 55  | 47        | 43      | 43     | 40 |

## By month

| Year      | Yellow Fever | Dengue fever | Lassa Fever | CCHF | RVF | Monkeypox | Anthrax | Plague |    |
|-----------|--------------|--------------|-------------|------|-----|-----------|---------|--------|----|
| January   | 13           | 4            |             | 10   | 3   | 5         | 4       | 7      | 3  |
| February  | 11           | 3            |             | 11   | 7   | 4         | 5       | 4      | 7  |
| March     | 9            | 8            |             | 8    | 2   | 6         | 4       | 6      | 4  |
| April     | 9            | 6            |             | 7    | 3   | 1         | 2       | 4      | 2  |
| May       | 11           | 8            |             | 4    | 8   | 1         | 3       | 8      | 2  |
| June      | 4            | 9            |             | 3    | 3   | 5         | 7       | 3      | 3  |
| July      | 5            | 2            |             | 2    | 3   | 1         | 1       |        | 1  |
| August    | 11           | 3            |             | 3    | 10  | 4         | 4       |        | 5  |
| September | 11           | 6            |             | 4    | 4   | 3         | 5       | 1      | 2  |
| October   | 10           | 7            |             | 1    | 4   | 3         | 5       | 5      | 7  |
| November  | 12           | 3            |             | 3    | 6   | 10        |         | 4      | 1  |
| December  | 12           | 2            |             | 3    | 2   | 4         | 3       | 1      | 3  |
| Total     | 118          | 61           |             | 59   | 55  | 47        | 43      | 43     | 40 |

| Ebola | Chikungunya | Other VHF | MVD | Zika virus | d Rabies | Dracunculi | Leishmania | Leptospirosis |
|-------|-------------|-----------|-----|------------|----------|------------|------------|---------------|
| 8     |             | 2         |     | 5          |          |            |            |               |
| 12    | 1           |           |     |            |          | 2          |            |               |
| 1     | 2           |           |     |            |          |            |            |               |
|       | 4           |           |     | 1          |          | 1          | 2          | 2             |
| 1     |             |           |     | 1          |          |            |            |               |
| 1     |             |           |     |            |          |            |            |               |
| 5     | 2           |           |     |            |          |            |            |               |
|       | 2           |           |     |            |          |            |            |               |
| 1     |             | 1         |     |            |          |            |            |               |
|       |             |           |     |            |          |            | 1          |               |
| 1     |             |           | 1   |            |          |            |            |               |
| 1     |             |           |     |            | 1        |            |            |               |
|       |             | 1         |     |            | 1        |            |            |               |
|       | 1           | 2         |     | 1          | 1        |            |            | 1             |
|       |             |           |     | 1          | 2        | 1          | 1          |               |
|       |             |           |     |            |          |            | 1          |               |
|       | 3           |           |     |            |          |            | 1          |               |
|       |             |           |     |            |          |            | 1          |               |
|       | 1           |           |     |            |          |            |            | 1             |
|       |             |           | 1   |            |          |            |            |               |
| 1     | 2           |           |     |            |          |            |            |               |
|       | 1           |           |     |            |          |            |            |               |
|       |             | 1         |     |            |          |            | 1          |               |
|       |             |           |     |            | 2        |            |            |               |
|       | 1           |           |     |            |          |            |            |               |
|       | 2           |           |     |            |          |            |            |               |
|       |             |           |     |            | 1        |            |            |               |
|       |             |           |     |            |          |            |            | 1             |
| 32    | 22          | 9         | 8   | 7          | 6        | 4          | 4          | 4             |

| Ebola | Chikungunya | Other VHF | MVD | Zika VD | Rabies | Dracunculi | Leishmania | Leptospirosis |
|-------|-------------|-----------|-----|---------|--------|------------|------------|---------------|
| 2     |             |           |     |         |        |            |            |               |
| 3     |             |           |     |         |        | 1          |            | 1             |
| 1     | 2           |           |     | 1       |        |            |            | 2             |
| 3     | 2           |           |     | 2       |        |            |            |               |
| 1     |             |           | 2   |         |        |            |            |               |
|       | 1           |           |     |         |        |            |            |               |
|       | 2           |           |     |         |        |            |            |               |
| 1     | 1           |           |     |         |        | 1          |            |               |
| 3     | 1           |           |     | 1       |        |            |            |               |
| 7     |             |           |     | 1       |        |            |            |               |
|       | 1           |           | 2   |         | 1      | 1          |            |               |
|       | 2           |           | 3   |         | 4      | 1          |            |               |
| 1     |             |           | 2   | 2       | 2      |            |            | 1             |
| 2     | 2           |           |     |         |        | 2          | 2          |               |
| 2     | 3           |           |     |         |        |            |            | 2             |
| 1     | 2           |           |     |         |        |            | 1          | 1             |
| 2     | 1           |           |     | 1       |        |            | 1          |               |
| 3     | 2           |           |     |         |        |            |            | 1             |
| 32    | 22          | 9         |     | 8       | 7      | 6          | 4          | 4             |

| Ebola | Chikungunya | Other VHF | MVD | Zika VD | Rabies | Dracunculi | Leishmania | Leptospirosis |
|-------|-------------|-----------|-----|---------|--------|------------|------------|---------------|
| 1     | 4           |           |     |         | 1      |            |            |               |
| 1     | 6           |           |     |         | 1      | 1          |            |               |
| 2     | 1           |           | 2   | 1       |        | 2          |            |               |
| 1     |             |           |     |         | 1      | 2          | 1          | 1             |
| 5     | 3           |           |     |         |        |            | 1          |               |
| 3     | 2           |           |     |         |        |            |            | 1             |
| 3     | 2           |           |     | 1       | 1      |            | 1          | 3             |
| 6     | 1           |           |     | 1       |        |            | 1          | 1             |
| 2     | 1           |           | 2   | 1       |        | 1          |            | 1             |
| 2     |             |           | 4   | 4       | 2      |            |            | 1             |
| 3     | 2           |           | 1   |         | 1      |            |            |               |
| 3     |             |           |     |         |        |            |            |               |
| 32    | 22          | 9         |     | 8       | 7      | 6          | 4          | 4             |

| West Nile F |   | Brucellosis | Total | %     |
|-------------|---|-------------|-------|-------|
|             |   |             | 49    | 8.70% |
|             |   |             | 48    | 8.50% |
| 2           |   |             | 35    | 6.20% |
|             |   |             | 33    | 5.80% |
|             |   |             | 27    | 4.80% |
|             |   |             | 23    | 4.10% |
|             |   |             | 21    | 3.70% |
|             |   |             | 21    | 3.70% |
|             |   |             | 18    | 3.20% |
|             |   |             | 18    | 3.20% |
|             |   |             | 18    | 3.20% |
|             |   |             | 17    | 3.00% |
|             |   |             | 17    | 3.00% |
|             |   |             | 16    | 2.80% |
|             |   |             | 15    | 2.70% |
|             |   |             | 15    | 2.70% |
|             |   |             | 15    | 2.70% |
|             |   |             | 15    | 2.70% |
|             |   |             | 12    | 2.10% |
|             |   |             | 12    | 2.10% |
|             |   |             | 12    | 2.10% |
|             |   |             | 11    | 1.90% |
|             |   |             | 11    | 1.90% |
|             |   |             | 8     | 1.40% |
|             |   |             | 8     | 1.40% |
|             |   |             | 8     | 1.40% |
|             |   |             | 7     | 1.20% |
|             |   |             | 6     | 1.10% |
|             |   |             | 6     | 1.10% |
|             |   |             | 6     | 1.10% |
|             |   |             | 5     | 0.90% |
|             |   |             | 5     | 0.90% |
|             |   |             | 5     | 0.90% |
| 1           | 1 |             | 4     | 0.70% |
|             |   |             | 4     | 0.70% |
|             |   |             | 4     | 0.70% |
|             |   |             | 3     | 0.50% |
|             |   |             | 2     | 0.40% |
|             |   |             | 2     | 0.40% |
|             |   |             | 1     | 0.20% |
|             |   |             | 1     | 0.20% |
|             |   |             | 1     | 0.20% |
|             |   |             | 1     | 0.20% |
| 3           | 1 |             | 566   |       |

| West Nile | Brucellosis | Total |
|-----------|-------------|-------|
|           |             | 19    |
|           |             | 14    |
|           |             | 16    |
|           |             | 14    |
|           |             | 21    |
|           |             | 13    |
|           |             | 16    |
|           |             | 27    |
|           |             | 21    |
|           |             | 23    |
|           |             | 22    |
|           |             | 13    |
|           |             | 19    |
|           |             | 12    |
|           |             | 28    |
|           |             | 33    |
|           |             | 52    |
|           |             | 43    |
|           |             | 47    |
| 1         |             | 29    |
| 1         | 1           | 29    |
| 1         |             | 55    |
| 3         | 1           | 566   |

| West Nile | Brucellosis | Total |
|-----------|-------------|-------|
|           |             | 55    |
|           |             | 61    |
|           |             | 55    |
|           | 1           | 41    |
|           |             | 54    |
|           |             | 46    |
|           |             | 24    |
| 1         |             | 50    |
|           |             | 44    |
| 1         |             | 56    |
| 1         |             | 47    |
|           |             | 33    |
| 3         | 1           | 566   |
